# Supplementary material
Source: PubMed Central journal article supplement (PMC6237462)
Supplement: jciinsight-3-121438-s194.pdf [file jciinsight-3-121438-s194.pdf]

## **SUPPLEMENTAL MATERIAL**

### **Splicing modulation sensitizes chronic lymphocytic leukemia cells to venetoclax by remodeling mitochondrial apoptotic dependencies**

**Elisa ten Hacken, Rebecca Valentin, Fara Faye D. Regis, Jing Sun, Shanye Yin, Lillian Werner, Jing Deng, Michaela Gruber, Jessica Wong, Mei Zheng, Amy L. Gill, Michael Seiler, Peter Smith, Michael Thomas, Silvia Buonamici, Emanuela M. Ghia, Ekaterina Kim, Laura Z. Rassenti, Jan A. Burger, Thomas J. Kipps, Matthew L. Meyerson, Pavan Bachireddy, Lili Wang, Robin Reed, Donna Neuberg, Ruben D. Carrasco, Angela N. Brooks, Anthony Letai, Matthew S. Davids, Catherine J. Wu**

## SUPPLEMENTAL FIGURES

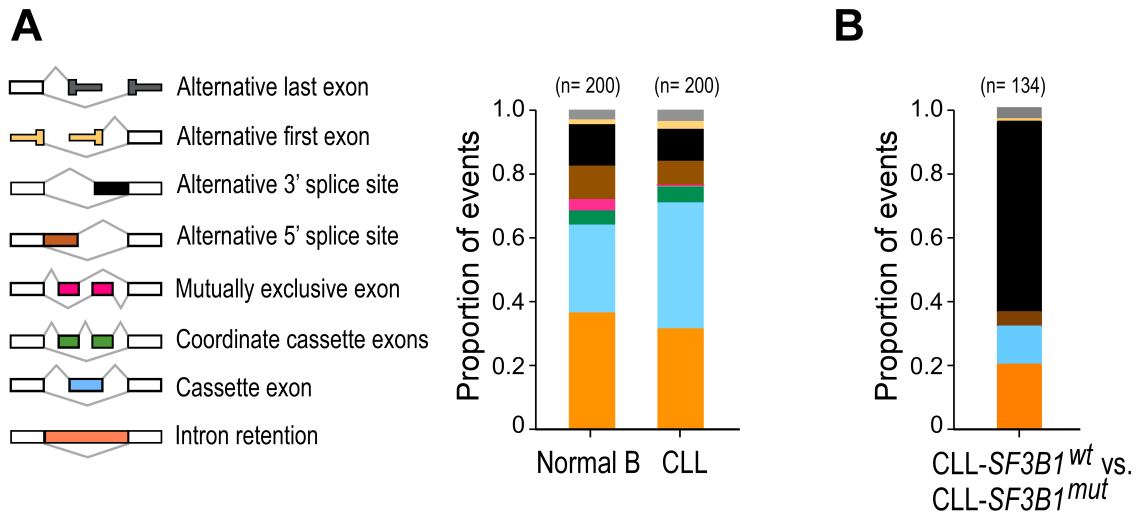

**Supplemental Figure 1. Alternative splicing patterns in normal B cells and CLL. (A)** Proportion of events within splicing categories of the 200 most variable splice events based on analysis of RNA-seq data from 7 normal B cell samples and 22 CLL samples. **(B)** Proportion of events within splicing categories of the 134 differential splice events based on analysis of RNA-seq data from 13 CLL-SF3B1<sup>wt</sup> compared to 9 CLL-SF3B1<sup>mut</sup> samples.

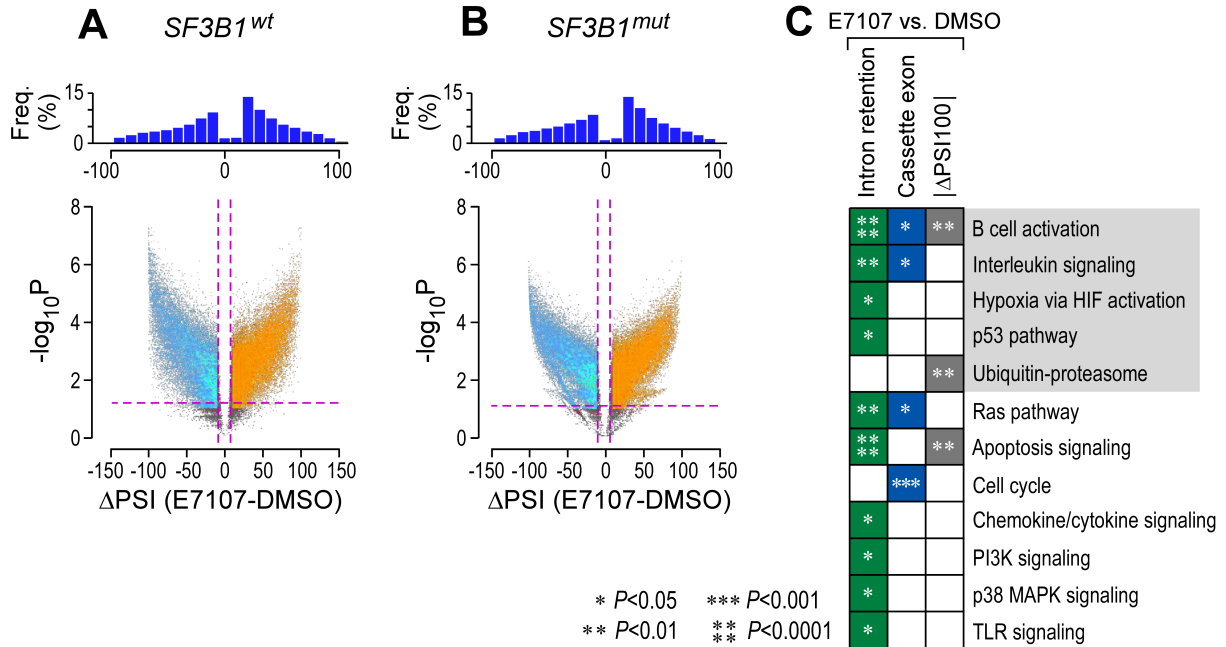

**Supplemental Figure 2. Splicing modulation broadly affects the CLL transcriptome, irrespective of *SF3B1* mutation status.** Frequency of delta Percent Spliced In ( $\Delta\text{PSI}$ ) for significant splice changes from the RNA-Seq data of (A) 6 *SF3B1*<sup>wt</sup> and (B) 5 *SF3B1*<sup>mut</sup> after 8 hours of treatment with 5nM E7107 compared to DMSO treated controls and volcano plot of  $\Delta\text{PSI}$  versus negative logarithmic P values ( $-\log_{10}P$ ) of all splicing changes. Pink dashed lines: thresholds of  $|\Delta\text{PSI}|$  of 10% and FDR of 10% (i.e.  $-\log_{10}P=1$ ) for significant splice changes. Orange dots: intron retention events; light blue dots: cassette exon events; grey dots: all other categories of splice events. (C) Pathway enrichment analysis by Panther algorithm of the 1000 most significant intron retention and the 1000 most significant cassette exon events, and the 471 events with  $|\Delta\text{PSI}|=100$  within the significantly modulated events after E7107 treatment as compared to DMSO control. The grey shaded area highlights pathways also enriched in **Figure 1E**. Significant  $P$  values are indicated in the Figure.

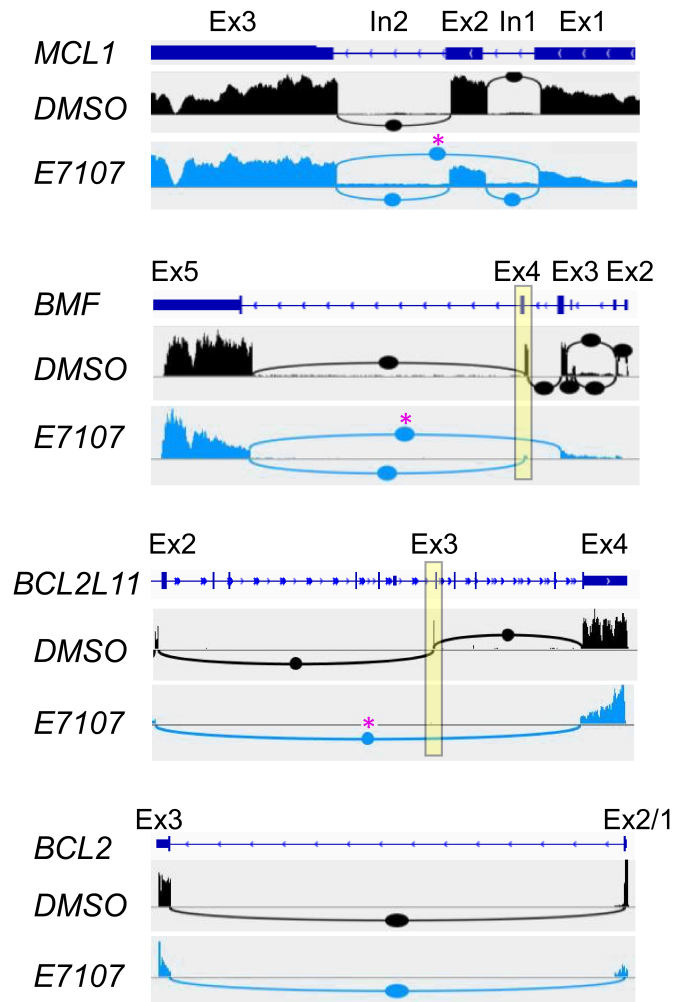

**Supplemental Figure 3. Splicing modulation by E7107 differentially affects splicing junctions in BCL2 family members.** Representative Sashimi plots of the *MCL1*, *BMF*, *BCL2L11* and *BCL2* genes showing splicing junctions after treatment with DMSO or E7107. Novel splicing junctions introduced by E7107 treatment are marked with a pink “\*”.

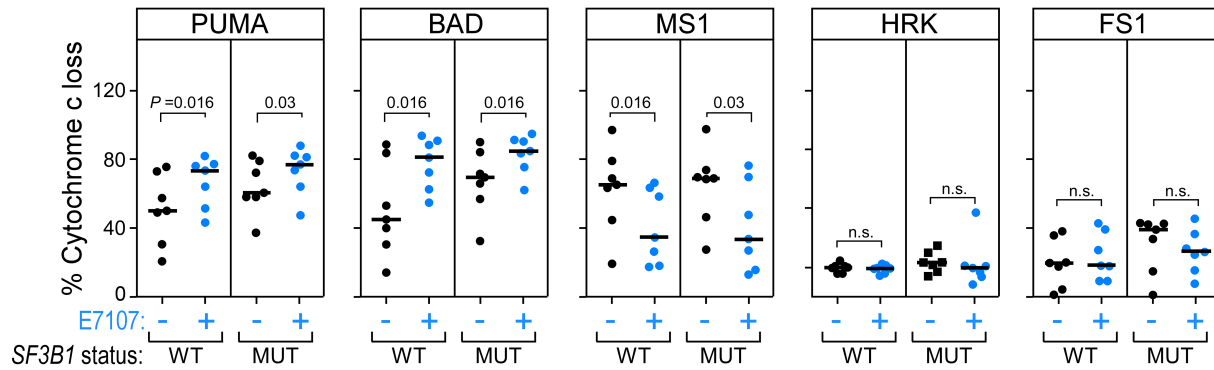

**Supplemental Figure 4. BH3 profiling analysis shows concordant modulation of signals across CLL samples after E7107 treatment.** Percentage (%) Cytochrome c loss as quantified by flow cytometry before and after overnight treatment of 14 CLLs subdivided based on *SF3B1* mutation status (7 *SF3B1*<sup>wt</sup>, 7 *SF3B1*<sup>mut</sup>) with 3nM E7107 in the presence of NK-TERT stroma. Panels from left to right refer to PUMA (overall priming), BAD peptide (BCL2 dependence), MS1 (MCL1 dependence), HRK (BCLxL dependence), FS1 (BFL1 dependence). Reported *P* values were calculated by Wilcoxon signed-rank test.

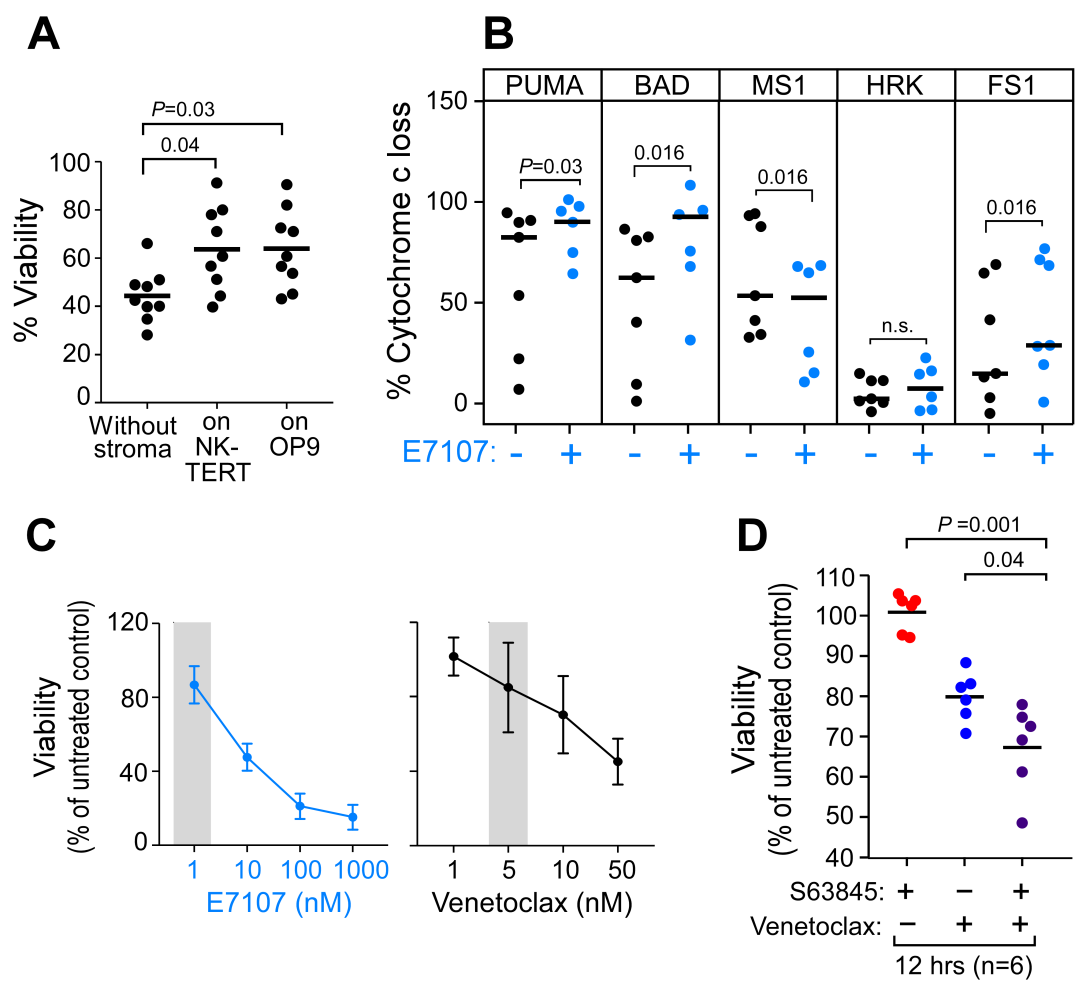

**Supplemental Figure 5. Establishment of experimental conditions for *in vitro* assays on human and murine CLL cells, and BH3 profiling of E $\mu$ -TCL1 splenocytes after E7107 treatment.** (A) Percentage (%) viability of 9 CLLs upon overnight incubation in the absence of stromal support or on either NK-TERT or OP9 stroma. *P* values were calculated by ANOVA with Scheffé's correction for multiple comparisons. (B) Percentage (%) Cytochrome c loss as quantified by flow cytometry on 7 TCL1 splenocyte preparations before and after 4 hours of treatment with 5nM E7107 on OP9 stroma. Panels from left to right refer to PUMA (overall priming), BAD peptide (BCL2 dependence), MS1 (MCL1 dependence), HRK (BCLxL dependence), FS1 (BFL1 dependence). Reported *P* values were calculated by Wilcoxon signed-rank test. (C) Mean  $\pm$  SD of percentage (%) viability of 4 TCL1 splenocyte preparations treated with increasing concentration of E7107 (left panel), or with increasing concentrations of venetoclax (right panel), overnight on OP9 stroma. Grey shaded areas indicate the drug concentrations chosen for the combination studies displayed in Figure 5D. (D) Percent (%) viability of the untreated control of 6 TCL1 samples after overnight treatment with 1nM S63845, 5nM venetoclax or their combination, on OP9 stroma. Reported *P* values were calculated by one-way ANOVA with Scheffé's correction for multiple comparisons.

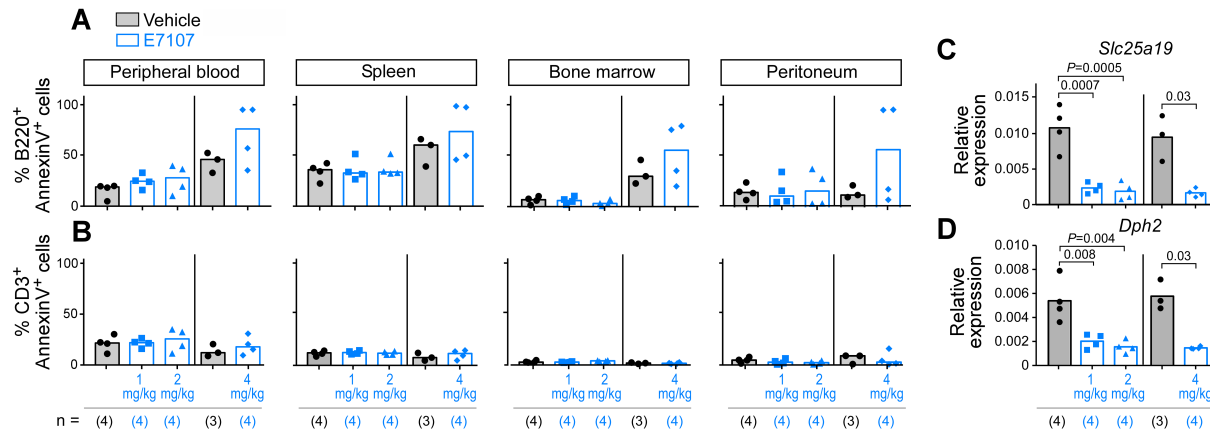

**Supplemental Figure 6. Dose range finding studies of E7107 in C57BL/6 wild type animals.** (A) Percentage (%) apoptotic normal B cells (B220<sup>+</sup>AnnexinV<sup>+</sup>) and (B) T cells (CD3<sup>+</sup>AnnexinV<sup>+</sup>) in the peripheral blood, spleen, bone marrow and peritoneum of mice treated with either vehicle control (black) or increasing concentrations (1-4mg/kg) E7107 (light blue) for 4 days. Vertical lines demarcate independent experiments. The number of animals/group are indicated in brackets below the corresponding bar. (C) Relative expression of mature RNA levels of *Slc25a19* (normalized to *Gapdh*) following 3 hours of treatment with 1-4mg/kg E7107 or vehicle control. *P* values were calculated by ANOVA with Scheffé's correction for multiple comparisons for the first three groups, by Mann Whitney *U* test for the remainder two. (D) Relative expression of mature RNA levels of *Dph2* (normalized to *Gapdh*) following 3 hours of treatment with 1-4mg/kg E7107 or vehicle control. *P* values were calculated by one-way ANOVA with Scheffé's correction for multiple comparisons for the first three groups, by Mann Whitney *U* test for the remainder two.

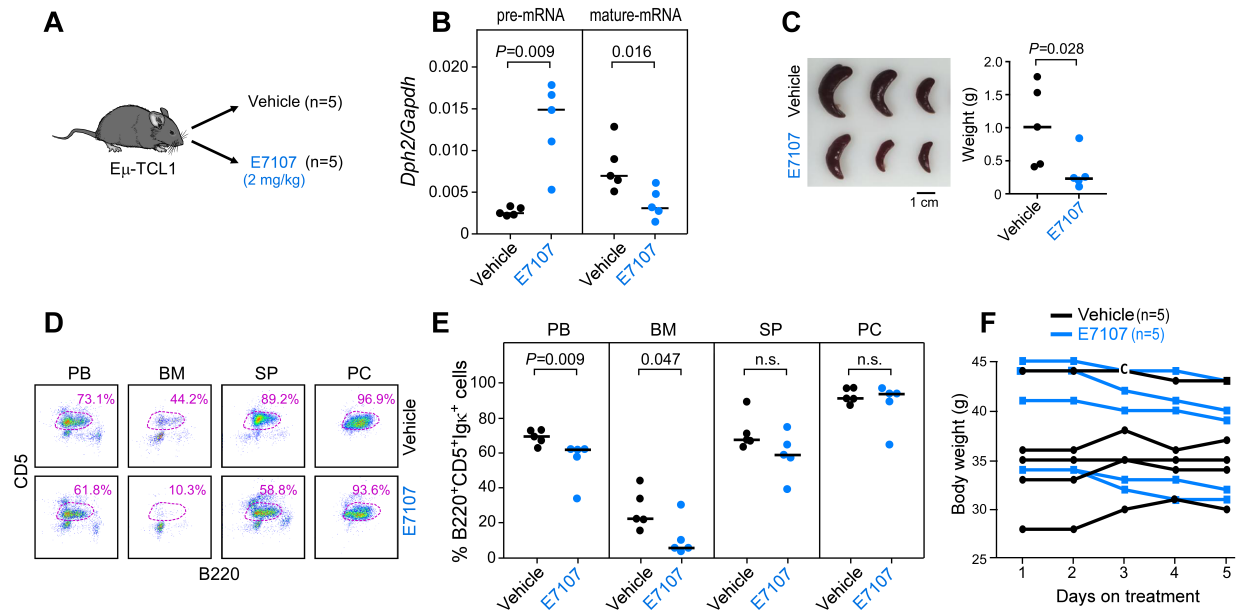

**Supplemental Figure 7. Treatment with single agent E7107 reduces leukemia burden in Eμ-TCL1 mice.** (A) Treatment schema of 12-month old Eμ-TCL1 animals (5 animals/group) treated for a week with either vehicle control or 2mg/kg E7107. (B) Relative expression of *Dph2* pre-mRNA and mature-mRNA (normalized to *Gapdh*) in the blood of vehicle control (black) or E7107 (light blue) treated animals, as analyzed 3 hours after the first E7107 dose. *P* values were calculated by Mann Whitney *U* test. (C) Representative spleens of 3 vehicle control treated and 3 E7107 treated animals, as harvested at the end of treatment. Spleen weights are expressed in grams (g), and a 1cm scale bar is indicated in the figure (n=5/group). *P* values were calculated by Mann Whitney *U* test. (D) Representative flow cytometry analyses of B220<sup>+</sup>CD5<sup>+</sup> CLL cells in the peripheral blood (PB), bone marrow (BM), spleen (SP), or peritoneum (PC) of one animal per group. (E) Percentage (%) B220<sup>+</sup>CD5<sup>+</sup>Igκ<sup>+</sup> CLL cells in the PB, BM, SP and PC, as analyzed by flow cytometry at the end of treatment. *P* values were calculated by Mann Whitney *U* test. (F) Body weight measurements expressed in grams (g) of vehicle control and E7107 treated animals throughout the 5-day treatment period.

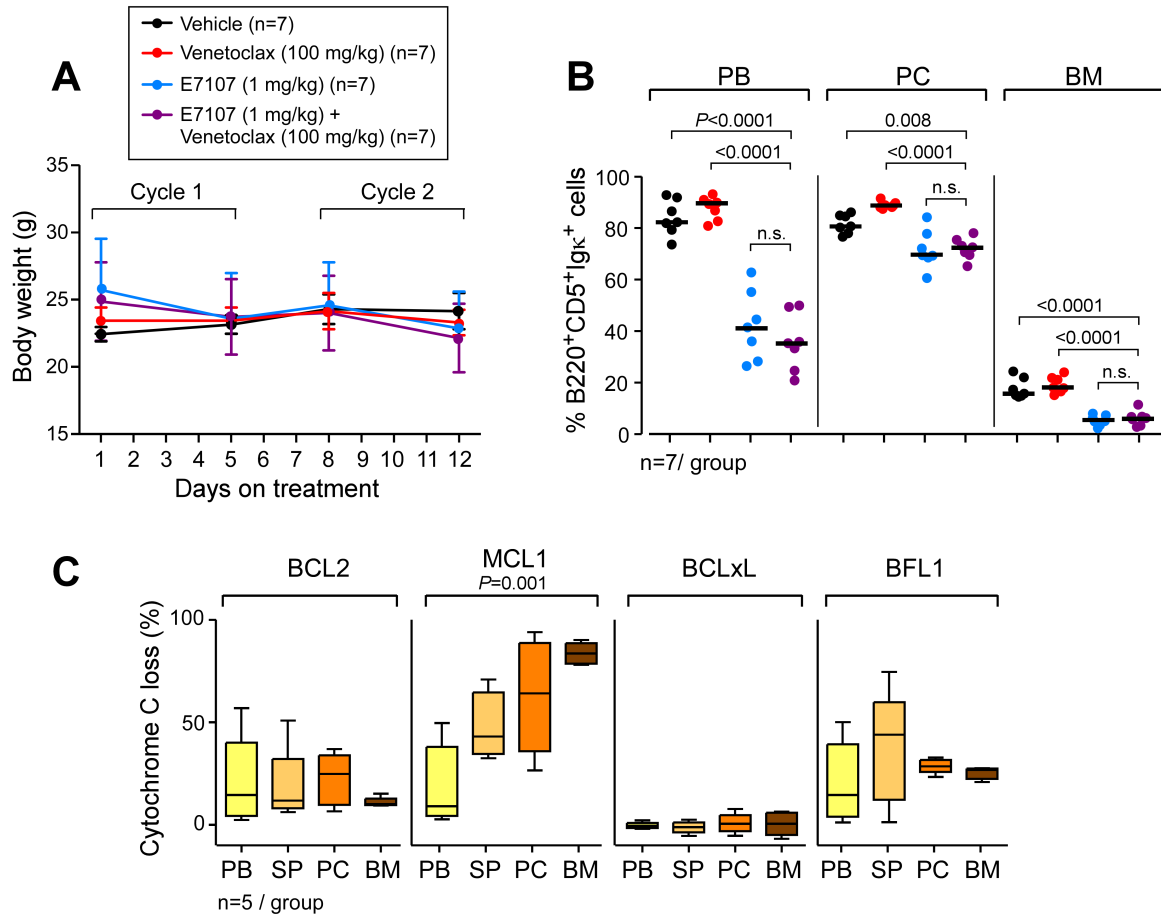

**Supplemental Figure 8. Combination treatment studies of E7107 and venetoclax in Eμ-TCL1 based transplants.** (A) Body weight measurements expressed in grams (g) of CD45.1 transplanted mice belonging to the 4 treatment groups (black: vehicle control; red: 100mg/kg venetoclax; light blue: 1mg/kg E7107; purple: combination of 1mg/kg E7107 and 100mg/kg venetoclax) at the beginning and at the end of each treatment cycle. (B) Percentage (%) B220<sup>+</sup>CD5<sup>+</sup>Igκ<sup>+</sup> CLL cells in the peripheral blood (PB), peritoneal cavity (PC), and bone marrow (BM) of CD45.1 transplants, as analyzed by flow cytometry at the end of treatment. Reported *P* values were calculated by one-way ANOVA with Scheffé's correction for multiple comparisons. (C) BH3 profiling analysis of CLL cells derived from the PB, spleen (SP), PC, and BM of 5 TCL1 mice. Panels from left to right refer to percentage (%) Cytochrome c loss after incubation with 1μM BAD peptide (BCL2 dependence), 1μM MS1 (MCL1 dependence), 1μM HRK (BCLxL dependence), 1μM FS1 (BFL1 dependence). Reported *P* value was calculated by two-way ANOVA.

## SUPPLEMENTAL TABLES

**Supplemental Table 1, related to Figures 1A-E and Supplemental Figure 1.**

Patient ID number and *SF3B1* mutational status of RNA-sequenced samples re-analyzed from our previous study <sup>1</sup>. MUT: mutated; WT: wild-type.

| Patient ID | <i>SF3B1</i> status |
|------------|---------------------|
| CLL005     | WT                  |
| CLL014     | WT                  |
| CLL024     | WT                  |
| CLL032     | MUT (K700E)         |
| CLL035     | WT                  |
| CLL037     | MUT (K700E)         |
| CLL043     | MUT (K700E)         |
| CLL047     | WT                  |
| CLL048     | WT                  |
| CLL059     | MUT (K700E)         |
| CLL060     | MUT (R625L)         |
| CLL061     | MUT (K700E)         |
| CLL073     | WT                  |
| CLL090     | WT                  |
| CLL093     | WT                  |
| CLL108     | WT                  |
| CLL109     | MUT (K666Q)         |
| CLL169     | MUT (K700E)         |
| CLL170     | WT                  |
| CLL193     | WT                  |
| CLL194     | WT                  |
| CLL195     | MUT (K700E)         |

## Supplemental Table 2, related to Figure 1E.

Pathway enrichment analysis results of the 192 most differential splicing events within CLL compared to normal B cells, and the CLL-specific splicing outliers represented in at least 7 out of 22 CLL samples (n=1138). Pathways enriched within each category, *P* values, and corresponding genes are included in the table. “\*” highlights the pathways displayed in **Figure 1E**.

| Normal B vs. CLL differential splicing (n=192)           | P-value   | -Log <sub>10</sub> P | Genes                               |
|----------------------------------------------------------|-----------|----------------------|-------------------------------------|
| T cell activation_Homo sapiens_P00053                    | 9.123E-06 | 5.040                | VAV3;PPP3CB;PTPRC;PPP3CC;LCK;NFATC1 |
| *B cell activation_Homo sapiens_P00010                   | 3.826E-05 | 4.417                | VAV3;PPP3CB;PTPRC;PRKCB;NFATC1      |
| PDGF signaling pathway_Homo sapiens_P00047               | 0.0067    | 2.175                | ARHGAP9;VAV3;RASA4;RPS6KB2          |
| *Notch signaling pathway_Homo sapiens_P00045             | 0.0264    | 1.578                | NCSTN;RBPJ                          |
| Alzheimer disease-presenilin pathway_Homo sapiens_P00004 | 0.0284    | 1.547                | NCSTN;DVL3;RBPJ                     |
| *Wnt signaling pathway_Homo sapiens_P00057               | 0.0383    | 1.416                | PPP3CB;PPP3CC;PRKCB;DVL3;NFATC1     |

| Splicing outliers enriched in CLL (n=1138)         | P-value | -Log <sub>10</sub> P | Genes                                                                       |
|----------------------------------------------------|---------|----------------------|-----------------------------------------------------------------------------|
| *De novo purine biosynthesis_Homo sapiens_P02738   | 0.0026  | 2.579                | ADSL;RRM1;IMPDH2;NME3;GART;ADS S                                            |
| T cell activation_Homo sapiens_P00053              | 0.0072  | 2.142                | PPP3CA;NRAS;PPP3CC;HLA-DMB;AKT2;ITPR1;LCP2;CSK;SOS2;NFKB1                   |
| *Interleukin signaling pathway_Homo sapiens_P00036 | 0.0083  | 2.081                | NRAS;IL4R;SHC1;IL10RA;MKNK1;MYC;AKT2;MKNK2;IL6ST;SOS2;MTOR                  |
| *Ubiquitin proteasome pathway_Homo sapiens_P00060  | 0.0092  | 2.035                | SMURF2;UBA7;MDM2;WWP2;UBE2G1;UBA1;UBE2A                                     |
| PDGF signaling pathway_Homo sapiens_P00047         | 0.0097  | 2.013                | ARHGAP9;PDGFRA;SHC1;ITPR1;FLI1;ARHGAP4;NRAS;MYC;AKT2;MKNK1;MKNK2;PLCG2;SOS2 |
| *B cell activation_Homo sapiens_P00010             | 0.0134  | 1.871                | LYN;PPP3CA;NRAS;CD19;ITPR1;BLNK;PLCG2;SOS2                                  |
| Parkinson disease_Homo sapiens_P00049              | 0.0146  | 1.835                | LYN;HSPA9;FGR;PSMA5;CSNK1G3;PSMA4;ADRBK2;CUL1;CSK;NDUFV2                    |
| *Cholesterol biosynthesis_Homo sapiens_P00014      | 0.0205  | 1.688                | FDPS;HMGCR;FDFT1                                                            |

|                                                                |        |       |                                                                                                 |
|----------------------------------------------------------------|--------|-------|-------------------------------------------------------------------------------------------------|
| CCKR signaling map<br>ST_Homo sapiens_P06959                   | 0.0226 | 1.646 | LYN;ROCK1;SHC1;ODC1;PXN;ITPR1;AR<br>HGAP4;PPP3CA;MYC;CASP3;BAX;CTN<br>NB1;PTK2B;CSK;CALM1;MEF2D |
| *Coenzyme A<br>biosynthesis_Homo<br>sapiens_P02736             | 0.0403 | 1.395 | PANK2;PANK3                                                                                     |
| *Hypoxia response via HIF<br>activation_Homo<br>sapiens_P00030 | 0.0422 | 1.374 | CREBBP;AKT2;HIF1A;MTOR                                                                          |
| *Oxidative stress<br>response_Homo<br>sapiens_P00046           | 0.0422 | 1.374 | MAX;MKNK1;MYC;MKNK2                                                                             |
| *p53 pathway_Homo<br>sapiens_P00059                            | 0.0440 | 1.357 | KAT2B;CREBBP;GADD45B;HDAC1;AKT<br>2;MDM2;BAX;MTA2                                               |

**Supplemental Table 3. Clinical and biological features of the primary CLL samples analyzed in this study.**

Age, Sex, Rai stage at diagnosis (na: not available), IGHV mutational status (unmutated-CLL, U-CLL; mutated-CLL, M-CLL), Cytogenetics (del: deletion; tri: trisomy; nd: not determined), *SF3B1* mutational status (MUT, mutant; WT, wild type), purity of CLL preparation defined by % CD19<sup>+</sup>CD5<sup>+</sup> of the total PBMC, as analyzed by flow cytometry (nd: not determined), and *in vitro* assays for which samples were utilized (RNA-seq: RNA sequencing; BH3, BH3 profiling; WB, Western Blot). IGHV gene mutational analysis was performed by PCR, followed by direct sequencing, and 98% cut-off was utilized for mutational status assessment. Percentage homology to germline IGHV sequence is indicated in parenthesis. Cytogenetic abnormalities were determined by fluorescent *in situ* hybridization (FISH), while *SF3B1* mutational status was determined by direct targeted sequencing.

| Pt # | Age | Sex | Rai Stage | IGHV status (% homology) | FISH                   | <i>SF3B1</i> status | Tumor Purity (%) | Assay                               |
|------|-----|-----|-----------|--------------------------|------------------------|---------------------|------------------|-------------------------------------|
| 1    | 54  | M   | 0         | U-CLL (99.6)             | tri12                  | WT                  | 99.4             | RNA-seq, viability, WB              |
| 2    | 50  | M   | III       | U-CLL (100)              | Normal                 | MUT (K700E)         | 99.6             | Viability, BH3                      |
| 3    | 65  | M   | I         | U-CLL (100)              | del13q, del17p         | MUT (K700E)         | 99.2             | RNA-seq, viability, WB              |
| 4    | 45  | F   | 0         | M-CLL (97.9)             | Normal                 | WT                  | 99.8             | RNA-seq, RT-PCR, viability, BH3     |
| 5    | 64  | M   | 0         | U-CLL (99.7)             | del17p                 | WT                  | 99.9             | RNA-seq                             |
| 6    | 59  | F   | 0         | M-CLL (95.8)             | del13q, tri12          | WT                  | 98.5             | RNA-seq, RT-PCR, viability, BH3     |
| 7    | 55  | M   | I         | U-CLL (100)              | del11q, del13q         | WT                  | 91.9             | RNA-seq, RT-PCR, viability, BH3, WB |
| 8    | 53  | F   | I         | U-CLL (100)              | del13q, del 17p        | MUT (Q659R)         | 99.6             | RNA-seq, viability, BH3             |
| 9    | 33  | F   | 0         | U-CLL (100)              | del13q                 | MUT (T663I)         | 98.2             | RNA-seq, viability, BH3             |
| 10   | 57  | F   | 0         | M-CLL (89.1)             | del13q                 | WT                  | 100              | RNA-seq, viability, BH3             |
| 11   | 37  | M   | 0         | U-CLL (99.7)             | del11q, del13q         | MUT (G742D)         | 93.4             | RNA-seq, viability                  |
| 12   | 58  | F   | I         | U-CLL (100)              | del13q                 | MUT (K666E)         | 88               | RNA-seq, viability, BH3             |
| 13   | 52  | F   | 0         | M-CLL (97.2)             | nd                     | WT                  | 99.8             | Viability                           |
| 14   | 72  | M   | 0         | U-CLL (100)              | nd                     | WT                  | 99.5             | Viability                           |
| 15   | 88  | F   | II        | U-CLL (100)              | tri12                  | MUT(K666 N)         | 99.4             | Viability, BH3                      |
| 16   | 53  | F   | 0         | U-CLL (100)              | del11q, del13q, del17p | MUT (E622D)         | 98.1             | Viability                           |

|    |    |   |     |                    |                   |                          |      |                    |
|----|----|---|-----|--------------------|-------------------|--------------------------|------|--------------------|
| 17 | 55 | M | III | U-CLL<br>(unknown) | del11q,<br>del13q | MUT<br>(K700E)           | 88.6 | Viability, BH3, WB |
| 18 | 57 | F | IV  | M-CLL (96)         | del11q,<br>del13q | WT                       | 96.1 | Viability, BH3, WB |
| 19 | 66 | F | IV  | U-CLL (100)        | del13q            | WT                       | 90.8 | Viability, BH3     |
| 20 | 70 | F | III | U-CLL (100)        | del17p            | WT                       | 86.9 | Viability, BH3     |
| 21 | 75 | F | 0   | U-CLL (100)        | Normal            | MUT<br>(G742D)           | 87.7 | Viability, BH3, WB |
| 22 | 73 | M | IV  | M-CLL (96)         | del11q            | MUT<br>(K700E)           | nd   | Viability, WB      |
| 23 | 46 | F | 0   | U-CLL<br>(unknown) | del13q            | MUT<br>(R630I,<br>D894G) | nd   | Viability, WB      |
| 24 | 60 | M | II  | M-CLL<br>(93.7)    | tri12             | WT                       | nd   | Viability          |
| 25 | 64 | M | 0   | nd                 | del17p,<br>del13q | WT                       | nd   | Viability          |
| 26 | 64 | M | I   | U-CLL (100)        | del13q            | WT                       | nd   | Viability, WB      |
| 27 | 67 | M | III | U-CLL (100)        | tri12             | WT                       | nd   | Viability, WB      |
| 28 | 52 | F | I   | M-CLL<br>(94.6)    | del17p,<br>del13q | WT                       | nd   | Viability, WB      |
| 29 | 53 | M | 0   | U-CLL (100)        | Normal            | WT                       | 99.8 | Viability          |
| 30 | 62 | M | 0   | M-CLL<br>(89.6)    | del13q            | WT                       | 98.5 | Viability          |
| 31 | 71 | M | 0   | U-CLL (99)         | del13q            | WT                       | 100  | Viability          |
| 32 | 42 | F | I   | M-CLL<br>(92.8)    | nd                | WT                       | nd   | Viability          |
| 33 | 49 | M | na  | M-CLL (93)         | del17p            | MUT<br>(K700E)           | nd   | Viability          |
| 34 | 58 | M | II  | U-CLL<br>(99.7)    | del11q,<br>del13q | MUT<br>(K666E)           | 99.9 | Viability          |

**Supplemental Table 4, related to Figure 2C and Suppl. Figure 2C.**

Pathway enrichment analysis of the 1000 most significant intron retention (IR) and the 1000 most significant cassette exon (CE) events after E7107 treatment, the events with  $|\Delta\text{PSI}| > 90$ , and the events with  $|\Delta\text{PSI}| = 100$ . Pathways enriched within each category, *P* values, and genes within each category are included in the table. “\*” highlights the pathways displayed in **Figure 2C** and **Supplemental Figure 2C**.

| Top1000 IR                                                                                   | P-value   | Genes                                                                                 |
|----------------------------------------------------------------------------------------------|-----------|---------------------------------------------------------------------------------------|
| *B cell activation_Homo sapiens_P00010                                                       | 1.890E-05 | NFKB1A;CD79B;CD19;BTK;PIK3CD;MAPK1;PTPN6;HRAS;MAPK12;NFKB2                            |
| PDGF signaling pathway_Homo sapiens_P00047                                                   | 2.550E-05 | ARHGAP9;GSK3A;STAT2;SRF;PIK3CD;ARHGAP4;RAB11B;AKT2;MKNK2;RPS6KB2;ERF;MAPK1;STAT6;HRAS |
| *Apoptosis signaling pathway_Homo sapiens_P00006                                             | 4.010E-05 | MAP4K2;DAXX;ATF6B;TNFRSF10B;PIK3CD;RELA;NFKB2;NFKB1A;AKT2;BAX;AKT1;MAPK1;MCL1         |
| *Ras Pathway_Homo sapiens_P04393                                                             | 0.0022    | GSK3A;SRF;AKT1;PIK3CD;MAPK1;RGL2;HRAS;MAPK12                                          |
| T cell activation_Homo sapiens_P00053                                                        | 0.0032    | NFKB1A;AKT2;WAS;AKT1;PIK3CD;MAPK1;HRAS;NFKB2                                          |
| Insulin/IGF pathway-protein kinase B signaling cascade_Homo sapiens_P00033                   | 0.0054    | GSK3A;AKT2;INPPL1;PIK3CD;AKT1                                                         |
| Parkinson disease_Homo sapiens_P00049                                                        | 0.0061    | BLK;PSMA4;CSNK1A1;ADRBK1;MAPK1;CSNK1D;UBE2J2;MAPK12                                   |
| *Interleukin signaling pathway_Homo sapiens_P00036                                           | 0.0086    | IL4R;AKT2;STAT2;SRF;MKNK2;AKT1;MAPK1;STAT6                                            |
| Huntington disease_Homo sapiens_P00029                                                       | 0.0095    | DCTN1;AKT2;ARPC1B;BAX;AKT1;AP2A1;DYNLL1;IFT57;ACTG1;ARF6                              |
| *p53 pathway_Homo sapiens_P00059                                                             | 0.0101    | HDAC1;AKT2;BAX;AKT1;TNFRSF10B;PIK3CD;MTA2                                             |
| EGF receptor signaling pathway_Homo sapiens_P00018                                           | 0.0117    | AKT2;STAT2;PPP2R5B;AKT1;PIK3CD;MAPK1;STAT6;HRAS;MAPK12                                |
| *Inflammation mediated by chemokine and cytokine signaling pathway_Homo sapiens_P00031       | 0.0118    | ARPC1B;INPPL1;PIK3CD;RELA;NFKB2;ACTG1;ARPC2;AKT2;GRK6;AKT1;MAPK1;CCR7;ITGB7           |
| *PI3 kinase pathway_Homo sapiens_P00048                                                      | 0.0132    | GNB2;AKT2;RPS6KB2;INPPL1;AKT1                                                         |
| p53 pathway feedback loops 2_Homo sapiens_P04398                                             | 0.0175    | AKT2;PIK3CD;AKT1;HRAS;MAPK12                                                          |
| FGF signaling pathway_Homo sapiens_P00021                                                    | 0.0191    | AKT2;PPP2R5B;AKT1;PIK3CD;MAPK1;PTPN6;HRAS;MAPK12                                      |
| *p38 MAPK pathway_Homo sapiens_P05918                                                        | 0.0221    | SRF;MKNK2;MEF2D;MAPK12                                                                |
| *Toll receptor signaling pathway_Homo sapiens_P00054                                         | 0.0245    | NFKB1A;IRF3;UBE2N;RELA;NFKB2                                                          |
| CCKR signaling map ST_Homo sapiens_P06959                                                    | 0.0250    | NFKB1A;CSNK1A1;SRF;BAX;AKT1;MAPK1;CSNK1D;MEF2D;ARHGAP4;MCL1;HDAC7                     |
| Angiotensin II-stimulated signaling through G proteins and beta-arrestin_Homo sapiens_P05911 | 0.0270    | GNB2;ADRBK1;GRK6;MAPK1                                                                |

|                                                          |        |                   |
|----------------------------------------------------------|--------|-------------------|
| p53 pathway by glucose deprivation_Homo sapiens_P04397   | 0.0326 | AKT2;RPS6KB2;AKT1 |
| Salvage pyrimidine ribonucleotides_Homo sapiens_P02775   | 0.0430 | UCK1;NME3         |
| *Hypoxia response via HIF activation_Homo sapiens_P00030 | 0.0461 | AKT2;PIK3CD;AKT1  |

| Top1000 CE                                                                                         | P-value   | Genes                                                                                       |
|----------------------------------------------------------------------------------------------------|-----------|---------------------------------------------------------------------------------------------|
| PDGF signaling pathway_Homo sapiens_P00047                                                         | 2.810E-05 | ARHGAP9;STAT5A;GSK3A;STAT2;PIK3R2;ELF2;RASA1;MKNK1;RPS6KB2;NCK2;MAPK1;STAT6;PLCG1;RAF1;HRAS |
| *Cell cycle_Homo sapiens_P00013                                                                    | 0.0003    | CCND3;PSMD11;PSMD14;PSMD4;PSMD3                                                             |
| *Ras Pathway_Homo sapiens_P04393                                                                   | 0.0173    | GSK3A;MAPK1;RAF1;RGL2;HRAS;RHOA;MAPK12                                                      |
| *Interleukin signaling pathway_Homo sapiens_P00036                                                 | 0.0184    | STAT5A;IL4R;RASA1;MKNK1;STAT2;MAPK1;STAT6;RAF1                                              |
| Nicotine pharmacodynamics pathway_Homo sapiens_P06587                                              | 0.0220    | EPB41;GNB1;FLNA;PPP1CA                                                                      |
| *B cell activation_Homo sapiens_P00010                                                             | 0.0227    | CD79B;CD19;MAPK1;RAF1;HRAS;MAPK12                                                           |
| T cell activation_Homo sapiens_P00053                                                              | 0.0229    | NCK2;MAPK1;PIK3R2;PLCG1;RAF1;HRAS;NFKB1                                                     |
| Insulin/IGF pathway-mitogen activated protein kinase kinase/MAP kinase cascade_Homo sapiens_P00032 | 0.0247    | RASA1;RPS6KB2;MAPK1;RAF1                                                                    |
| EGF receptor signaling pathway_Homo sapiens_P00018                                                 | 0.0259    | STAT5A;RASA1;STAT2;MAPK1;STAT6;PLCG1;RAF1;HRAS;MAPK12                                       |
| Pyruvate metabolism_Homo sapiens_P02772                                                            | 0.0360    | CS;PKM                                                                                      |
| Parkinson disease_Homo sapiens_P00049                                                              | 0.0377    | HSPA9;ADRBK1;STX7;CUL1;MAPK1;CSNK1D;MAPK12                                                  |
| Angiotensin II-stimulated signaling through G proteins and beta-arrestin_Homo sapiens_P05911       | 0.0415    | ADRBK1;GNB1;MAPK1;RAF1                                                                      |
| TCA cycle_Homo sapiens_P00051                                                                      | 0.0452    | CS;SDHC                                                                                     |

| \Delta PSI >90                                    | P-value   | Genes                                                                                                                            |
|---------------------------------------------------|-----------|----------------------------------------------------------------------------------------------------------------------------------|
| PDGF signaling pathway_Homo sapiens_P00047        | 1.339E-06 | ARHGAP9;CHUK;STAT1;STAT2;ARAF;ITPR1;PIK3R2;PIK3CB;FLI1;ARHGAP12;RPS6KA3;MAPK7;PIK3CA;RPS6KB1;RASA1;RASA2;RPS6KA1;PLCG2;PKN2;JAK2 |
| *Ubiquitin proteasome pathway_Homo sapiens_P00060 | 5.885E-05 | SMURF2;UBE3C;PSMD4;PSMD13;UBA6;UBA3;UBA2;UBE2D1;WWP2;UBE2K                                                                       |
| T cell activation_Homo sapiens_P00053             | 0.0004    | PPP3CB;PPP3CC;HLA-DMB;PIK3CA;CHUK;ARAF;ITPR1;WAS;LCP2;PIK3R2;PIK3CB;NFKB1                                                        |

|                                                                                                    |        |                                                                                               |
|----------------------------------------------------------------------------------------------------|--------|-----------------------------------------------------------------------------------------------|
| EGF receptor signaling pathway_Homo sapiens_P00018                                                 | 0.0017 | STAT1;STAT2;PPP2R5B;PPP2R5D;PPP2R5C;PIK3CB;MAPK13;PIK3CA;RRAS;RASA1;RASA2;PLCG2;MAP3K4;MAP3K5 |
| FGF signaling pathway_Homo sapiens_P00021                                                          | 0.0020 | PPP2R5B;PPP2R5D;PPP2R2A;PPP2R5C;PIK3CB;MAPK13;PIK3CA;PPP2R1B;RASA1;RASA2;PLCG2;MAP3K4;MAP3K5  |
| *Apoptosis signaling pathway_Homo sapiens_P00006                                                   | 0.0026 | ATF2;CHUK;PIK3CB;IGF2R;NFKB1;BCL2L11;CASP8;PIK3CA;MADD;REL;FAS;RIPK1;MAP3K5                   |
| *Interleukin signaling pathway_Homo sapiens_P00036                                                 | 0.0052 | RPS6KA3;IL4R;MAPK7;PIK3CA;CHUK;STAT1;RASA1;STAT2;RPS6KA1;ARAF;PIK3CB                          |
| *Hypoxia response via HIF activation_Homo sapiens_P00030                                           | 0.0072 | EGLN1;CREBBP;PIK3CA;PIK3R2;PIK3CB                                                             |
| *Cell cycle_Homo sapiens_P00013                                                                    | 0.0082 | PSMD4;PSMD13;PSMD3;ANAPC10                                                                    |
| *B cell activation_Homo sapiens_P00010                                                             | 0.0093 | PPP3CB;PIK3CA;CHUK;ARAF;ITPR1;PLCG2;PIK3CB;MAPK13                                             |
| *Ras Pathway_Homo sapiens_P04393                                                                   | 0.0097 | ATF2;RPS6KA3;PIK3CA;STAT1;RPS6KA1;ARAF;PIK3CB;MAP3K4;MAPK13                                   |
| *Notch signaling pathway_Homo sapiens_P00045                                                       | 0.0134 | APH1A;NEURL4;NCSTN;MFNG;NUMB;RBPJ                                                             |
| Insulin/IGF pathway-mitogen activated protein kinase kinase/MAP kinase cascade_Homo sapiens_P00032 | 0.0163 | RPS6KA3;RPS6KB1;RASA1;RPS6KA1;IGF2R                                                           |
| Axon guidance mediated by netrin_Homo sapiens_P00009                                               | 0.0187 | VASP;PIK3CA;PLCG2;PIK3R2;PIK3CB                                                               |
| Mannose metabolism_Homo sapiens_P02752                                                             | 0.0357 | GMPPB;PMM2                                                                                    |
| Coenzyme A biosynthesis_Homo sapiens_P02736                                                        | 0.0357 | PANK4;PANK2                                                                                   |

| <b> ΔPSI =100</b>                                 | <b>P-value</b> | <b>Genes</b>                       |
|---------------------------------------------------|----------------|------------------------------------|
| *B cell activation_Homo sapiens_P00010            | 0.0021         | PPP3CB;CHUK;ARAF;ITPR1;PLCG2       |
| *Apoptosis signaling pathway_Homo sapiens_P00006  | 0.0059         | ATF2;BCL2L11;CHUK;FAS;IGF2R;MAP3K5 |
| *Ubiquitin proteasome pathway_Homo sapiens_P00060 | 0.0048         | SMURF2;UBE3C;UBA6;UBA2             |
| T cell activation_Homo sapiens_P00053             | 0.0062         | PPP3CB;CHUK;ARAF;ITPR1;PIK3R2      |
| PDGF signaling pathway_Homo sapiens_P00047        | 0.0092         | CHUK;RASA2;ARAF;PLCG2;ITPR1;PIK3R2 |

## REFERENCES

1. Wang L, Brooks AN, Fan J, et al. Transcriptomic Characterization of SF3B1 Mutation Reveals Its Pleiotropic Effects in Chronic Lymphocytic Leukemia. *Cancer Cell*. 2016;30(5):750-763.
